# Supplementary material for: The dynamic conductance response and mechanics-modulated memristive behavior of the Azurin monolayer under cyclic loads
Source: Royal Society of Chemistry journal article supplement (doi:10.1039/c6cp08044h), 2017-01-01

# Supplemental Material for

## “The dynamic conductance response and mechanics-modulated memristive behavior of Azurin monolayer under cyclic loads”

Xiaoyue Zhang<sup>abc</sup>, Jian Shao<sup>ab</sup>, Yun Chen<sup>ab</sup>, Weijin Chen<sup>ab</sup>, Jing Yu<sup>ab</sup>, Biao Wang<sup>ac</sup>

and Yue Zheng<sup>\*abd</sup>

*<sup>a</sup>State Key Laboratory of Optoelectronic Materials and Technologies, Sun Yat-sen University, Guangzhou, 510275, China. E-mail: zhengy35@mail.sysu.edu.cn*

*<sup>b</sup>Micro&Nano Physics and Mechanics Research Laboratory, School of Physics, Sun Yat-sen University, Guangzhou, 510275, China.*

*<sup>c</sup>Sino-French Institute of Nuclear Engineering and Technology, Sun Yat-sen University, Zhuhai, 519082, China.*

*<sup>d</sup>Departments of Mechanical Engineering and Civil and Environmental Engineering, Northwestern University, Evanston, IL 60208, USA.*

**Figure 1. The AFM image of Au(111) atomically flat substrate.**

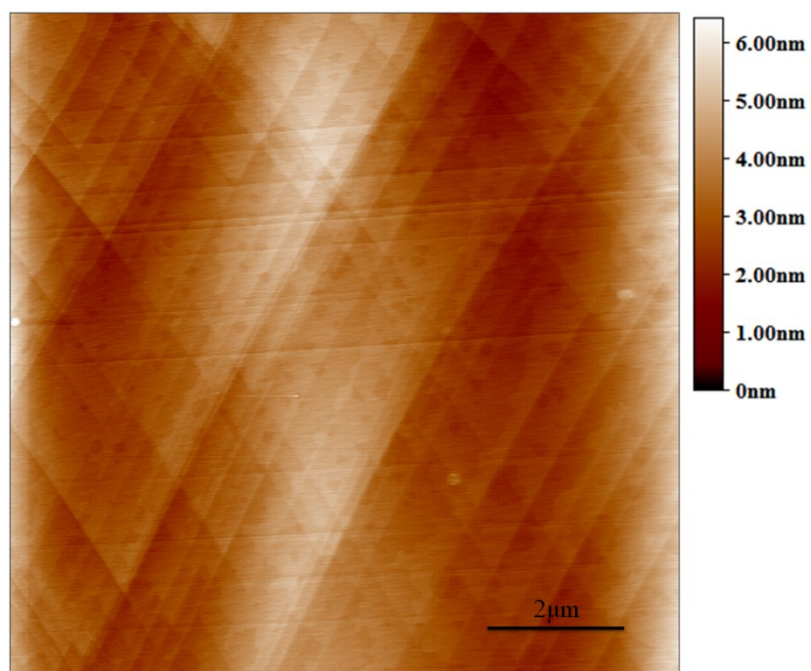

**Figure 2. The SEM image of the conductive spherical tip with 1μm curvature radius.**

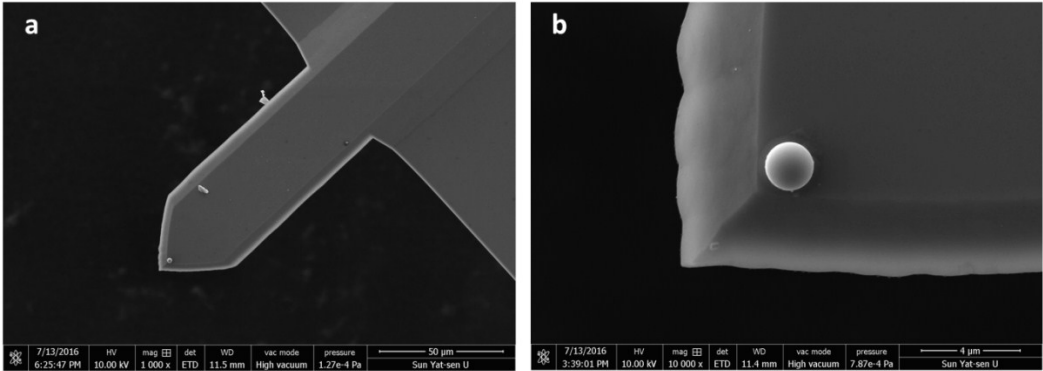

**Figure 3. The illustration of tip force vs. time of cycle iv in Figure 5b.**

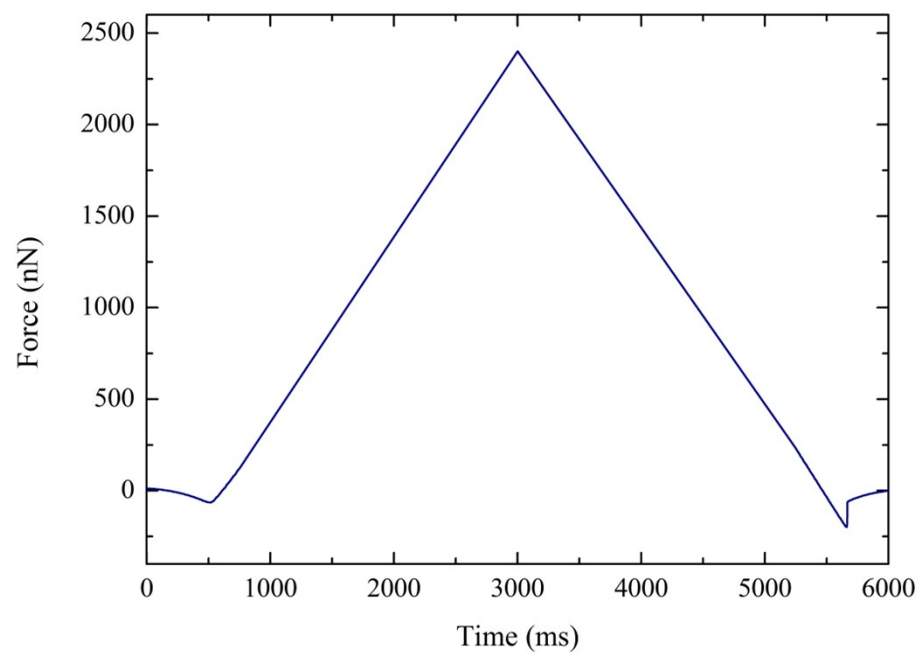

**Figure 4. The structural information of Az in MD simulation** The conformational angles (a) phi and (b) psi. (c) bond angles of  $C_{\alpha}$  of Az during under mechanical manipulation in MD.

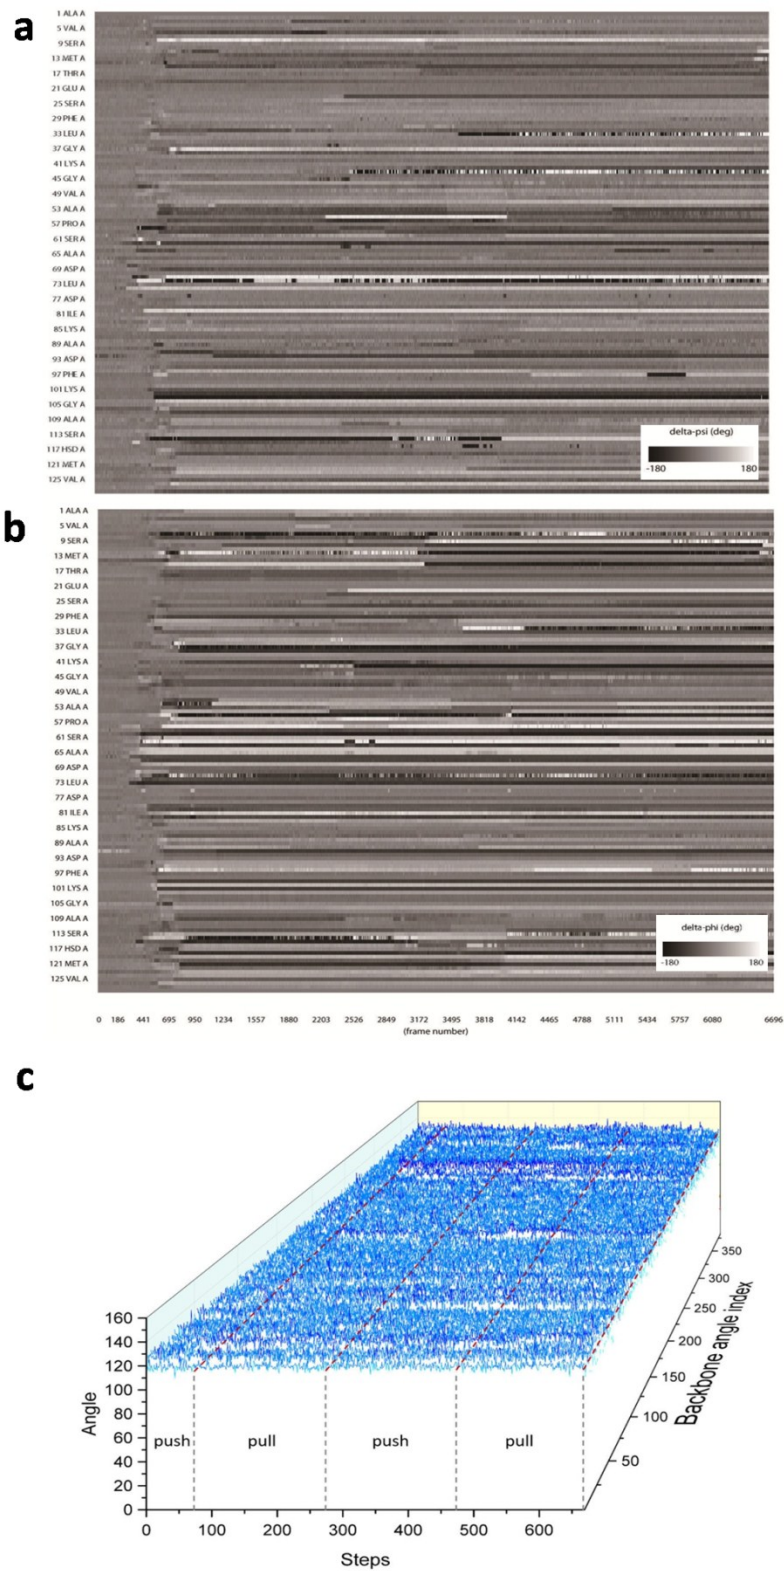

Supplement: c6cp08044h1.pdf [file c6cp08044h1.pdf]
